# Supplementary material
Source: PubMed Central journal article supplement (PMC4790832)
Supplement: raid009216.ww1_default.pdf [file raid009216.ww1_default.pdf]

*Rai et al. Parental depression, maternal antidepressant use during pregnancy, and the risk of autism spectrum disorders: population based case-control study*

**SUPPLEMENTARY TABLES**

| <b>Table S1. International classification of diseases diagnostic codes used to identify a history of depression and other psychiatric disorders in parents before the birth of the index child.</b> |                                         |                                           |                                           |
|-----------------------------------------------------------------------------------------------------------------------------------------------------------------------------------------------------|-----------------------------------------|-------------------------------------------|-------------------------------------------|
| <b>Diagnosis group</b>                                                                                                                                                                              | <b>ICD10 (1997-)</b>                    | <b>Nordic version of ICD9 (1987-1996)</b> | <b>Nordic version of ICD8 (1969-1986)</b> |
| Alcohol/drugs misuse                                                                                                                                                                                | F10-F19                                 | 291A-292X, 303A-305X                      | 291.00-291.99, 294.30, 303.00-304.99      |
| Schizophrenia                                                                                                                                                                                       | F20-29                                  | 295,297,298 [C-Z]                         | 295,297,29820-29899, 29999                |
| Bipolar disorder                                                                                                                                                                                    | F30-31                                  | 296 [A,C,D,E]                             | 2961, 2963                                |
| Depression                                                                                                                                                                                          | F32-39                                  | 300E, 298A, 296B, 311                     | 2962, 3004                                |
| Anxiety disorders                                                                                                                                                                                   | F40-43                                  | 300[A,C,D], 308, 309                      | 300 [0,2,3]                               |
| Somatoform disorders                                                                                                                                                                                | F44-48                                  | 300 [B,F,G,H]; 306, 307W                  | 300 [1,5,6,7]; 305                        |
| Personality disorder                                                                                                                                                                                | F60-F69                                 | 301                                       | 301                                       |
| Neurodevelopment disorder                                                                                                                                                                           | F70-F82, F84, F889, F90, F95, F98 [5,6] | 299, 307 [A,C], 314-315, 317-319          | 306 [0,1,2,3], 308, 310-315               |

| Table S2 Individual antidepressant drugs according to the Anatomical Therapeutic Chemical Classification system by the World Health Organization. |                                                                        |
|---------------------------------------------------------------------------------------------------------------------------------------------------|------------------------------------------------------------------------|
| <b>ATC category N06AB:</b> Selective Serotonin Reuptake Inhibitors                                                                                | <b>ATC category N06AA:</b> Non-selective monoamine reuptake inhibitors |
| Fluoxetine<br>Citalopram<br>Paroxetine<br>Sertraline                                                                                              | Clomipramine<br>Amitriptyline<br>Nortriptyline                         |
| Note: the list includes the drugs used in the sample                                                                                              |                                                                        |

| Table S3 Parental History of Depression before birth of child and risk of offspring ASD in children BORN BEFORE 1990                                                                                                                                                                                                                                                                                                                                                                              |                      |                   |                   |                   |                   |
|---------------------------------------------------------------------------------------------------------------------------------------------------------------------------------------------------------------------------------------------------------------------------------------------------------------------------------------------------------------------------------------------------------------------------------------------------------------------------------------------------|----------------------|-------------------|-------------------|-------------------|-------------------|
|                                                                                                                                                                                                                                                                                                                                                                                                                                                                                                   | N cases/<br>controls | Crude OR          | Model 1           | Model 2           | Model 3           |
| <b>Mothers</b>                                                                                                                                                                                                                                                                                                                                                                                                                                                                                    |                      |                   |                   |                   |                   |
| ASD                                                                                                                                                                                                                                                                                                                                                                                                                                                                                               | 14/46                | 3.03 (1.64-5.59)  | 2.56 (1.36-4.79)  | 2.66 (1.42-4.99)  | 2.61 (1.39-4.91)  |
| ASD+ID                                                                                                                                                                                                                                                                                                                                                                                                                                                                                            | 3/16                 | 2.02 (0.57-7.09)  | 1.80 (0.49-6.58)  | 1.97 (0.54-7.19)  | 1.88 (0.51-6.88)  |
| ASD-ID                                                                                                                                                                                                                                                                                                                                                                                                                                                                                            | 11/30                | 3.52 (1.74-7.13)  | 2.63 (1.27-5.47)  | 2.68 (1.29-5.56)  | 2.65 (1.27-5.51)  |
| <b>Fathers</b>                                                                                                                                                                                                                                                                                                                                                                                                                                                                                    |                      |                   |                   |                   |                   |
| ASD                                                                                                                                                                                                                                                                                                                                                                                                                                                                                               | 2/24                 | 0.75 (0.18-3.17)  | 0.78 (0.18-3.34)  | 0.78 (0.18-3.37)  | 0.79 (0.18-3.40)  |
| ASD+ID                                                                                                                                                                                                                                                                                                                                                                                                                                                                                            | 2/7                  | 2.67 (0.54-13.27) | 2.43 (0.47-12.53) | 2.44 (0.47-12.60) | 2.47 (0.48-12.82) |
| ASD-ID                                                                                                                                                                                                                                                                                                                                                                                                                                                                                            | 0/17                 | -                 | -                 | -                 | -                 |
| <p>Numbers in study: ASD cases n=1113, controls n=10599;<br/> ASD+ID cases n=442, controls n=4319;<br/> ASD-ID cases n=671, controls n=6280</p> <p>Model 1 adjusted for parental ages, income, education, occupation, migration status, parity<br/> Model 2= model 1+ any other psychiatric condition (including psychosis, bipolar, neurodevelopmental, personality or drug and alcohol misuse disorders)<br/> Model 3= model 2+ both parents depression, both parents other psych condition</p> |                      |                   |                   |                   |                   |

| Table S4 Parental History of Depression before birth of child and risk of offspring ASD- PRIMIPARAS                                                                                                                                                                                                                                                                                                                                                                                                 |                      |                  |                  |                  |                  |
|-----------------------------------------------------------------------------------------------------------------------------------------------------------------------------------------------------------------------------------------------------------------------------------------------------------------------------------------------------------------------------------------------------------------------------------------------------------------------------------------------------|----------------------|------------------|------------------|------------------|------------------|
|                                                                                                                                                                                                                                                                                                                                                                                                                                                                                                     | N cases/<br>controls | Crude OR         | Model 1          | Model 2          | Model 3          |
| <b>Mothers</b>                                                                                                                                                                                                                                                                                                                                                                                                                                                                                      |                      |                  |                  |                  |                  |
| ASD                                                                                                                                                                                                                                                                                                                                                                                                                                                                                                 | 25/109               | 2.20 (1.32-3.68) | 1.97 (1.17-3.30) | 2.01 (1.20-3.38) | 1.92 (1.14-3.24) |
| ASD+ID                                                                                                                                                                                                                                                                                                                                                                                                                                                                                              | 5/40                 | 1.41 (0.50-4.02) | 1.47 (0.49-4.36) | 1.51 (0.51-4.51) | 1.36 (0.44-4.19) |
| ASD-ID                                                                                                                                                                                                                                                                                                                                                                                                                                                                                              | 20/69                | 2.59 (1.43-4.69) | 2.15 (1.17-3.94) | 2.19 (1.19-4.01) | 2.18 (1.19-4.02) |
| <b>Fathers</b>                                                                                                                                                                                                                                                                                                                                                                                                                                                                                      |                      |                  |                  |                  |                  |
| ASD                                                                                                                                                                                                                                                                                                                                                                                                                                                                                                 | 6/72                 | 0.81 (0.34-1.97) | 0.68 (0.28-1.65) | 0.70 (0.29-1.70) | 0.70 (0.29-1.70) |
| ASD+ID                                                                                                                                                                                                                                                                                                                                                                                                                                                                                              | 3/31                 | 1.45 (0.38-5.57) | 1.02 (0.26-3.98) | 1.03 (0.26-4.01) | 1.05 (0.27-4.12) |
| ASD-ID                                                                                                                                                                                                                                                                                                                                                                                                                                                                                              | 3/41                 | 0.57 (0.17-1.91) | 0.49 (0.14-1.67) | 0.50 (0.15-1.70) | 0.50 (0.15-1.70) |
| <p>Numbers in study: ASD cases n=2104, controls n=19163;<br/> ASD+ID cases n=773, controls n=8139;<br/> ASD-ID cases n=1331, controls n=11024</p> <p>Model 1 adjusted for parental ages, income, education, occupation, migration status, parity<br/> Model 2= model 1+ any other psychiatric condition (including psychosis, bipolar, neurodevelopmental, personality or drug and alcohol misuse disorders)<br/> Model 3= model 2+ both parents depression, both parents other psych condition</p> |                      |                  |                  |                  |                  |

| Table S5 Parental History of Depression before birth of child and risk of offspring ASD- IN SWEDISH PARENTS ONLY                                                                                                                                                                                                                                                                                                                                                                                      |                   |                  |                  |                  |                  |
|-------------------------------------------------------------------------------------------------------------------------------------------------------------------------------------------------------------------------------------------------------------------------------------------------------------------------------------------------------------------------------------------------------------------------------------------------------------------------------------------------------|-------------------|------------------|------------------|------------------|------------------|
| DEPRESSION                                                                                                                                                                                                                                                                                                                                                                                                                                                                                            | N cases/ controls | Crude OR         | Model 1          | Model 2          | Model 3          |
| <b>Mothers</b>                                                                                                                                                                                                                                                                                                                                                                                                                                                                                        |                   |                  |                  |                  |                  |
| ASD                                                                                                                                                                                                                                                                                                                                                                                                                                                                                                   | 39/223            | 1.82 (1.27-2.60) | 1.67 (1.16-2.39) | 1.71 (1.19-2.46) | 1.66 (1.15-2.39) |
| ASD+ID                                                                                                                                                                                                                                                                                                                                                                                                                                                                                                | 12/99             | 1.48 (0.79-2.80) | 1.33 (0.70-2.53) | 1.37 (0.72-2.60) | 1.32 (0.69-2.53) |
| ASD-ID                                                                                                                                                                                                                                                                                                                                                                                                                                                                                                | 27/124            | 2.02 (1.31-3.11) | 1.82 (1.17-2.83) | 1.87 (1.20-2.90) | 1.83 (1.18-2.85) |
| <b>Fathers</b>                                                                                                                                                                                                                                                                                                                                                                                                                                                                                        |                   |                  |                  |                  |                  |
| ASD                                                                                                                                                                                                                                                                                                                                                                                                                                                                                                   | 14/106            | 1.44 (0.81-2.56) | 1.27 (0.71-2.27) | 1.30 (0.72-2.32) | 1.32 (0.74-2.37) |
| ASD+ID                                                                                                                                                                                                                                                                                                                                                                                                                                                                                                | 7/44              | 2.18 (0.93-5.11) | 1.92 (0.81-4.56) | 1.97 (0.83-4.68) | 2.01 (0.85-4.78) |
| ASD-ID                                                                                                                                                                                                                                                                                                                                                                                                                                                                                                | 7/62              | 1.07 (0.48-2.38) | 0.95 (0.42-2.12) | 0.97 (0.43-2.17) | 0.98 (0.44-2.19) |
| <p>Numbers in study: ASD cases n=3434, controls n=33939;<br/> ASD+ID cases n=1286, controls n=14400;<br/> ASD-ID cases n=2148, controls n=19539</p> <p>Model 1 adjusted for parental ages, income, education, occupation, migration status, parity<br/> Model 2= model 1+ any other psychiatric condition (including psychosis, bipolar, neurodevelopmental, personality or drug and alcohol misuse disorders)<br/> Model 3= model 2+ both parents depression, both parents other psych condition</p> |                   |                  |                  |                  |                  |

| Table S6 Parental History of Depression before birth of child and risk of offspring ASD using a non-hierarchical coding of psychiatric disorders (multiple diagnoses in each parent were allowed)                                                                                                                                      |                   |                  |                  |                  |                  |
|----------------------------------------------------------------------------------------------------------------------------------------------------------------------------------------------------------------------------------------------------------------------------------------------------------------------------------------|-------------------|------------------|------------------|------------------|------------------|
| Relationship with prenatal Depression                                                                                                                                                                                                                                                                                                  | N cases/ controls | Crude OR         | Model 1          | Model 2          | Model 3          |
| Mothers                                                                                                                                                                                                                                                                                                                                | 4429/43277        |                  |                  |                  |                  |
| ASD                                                                                                                                                                                                                                                                                                                                    | 61/340            | 1.79 (1.36-2.37) | 1.65 (1.25-2.19) | 1.34 (1.00-1.80) | 1.32 (0.98-1.77) |
| ASD+ID                                                                                                                                                                                                                                                                                                                                 | 20/154            | 1.35 (0.84-2.17) | 1.24 (0.77-2.01) | 1.01 (0.61-1.68) | 0.98 (0.59-1.63) |
| ASD-ID                                                                                                                                                                                                                                                                                                                                 | 41/186            | 2.14 (1.51-3.03) | 1.91 (1.34-2.71) | 1.57 (1.09-2.26) | 1.55 (1.07-2.23) |
| Fathers                                                                                                                                                                                                                                                                                                                                |                   |                  |                  |                  |                  |
| ASD                                                                                                                                                                                                                                                                                                                                    | 33/192            | 1.72 (1.19-2.51) | 1.53 (1.05-2.23) | 1.31 (0.89-1.94) | 1.29 (0.88-1.92) |
| ASD+ID                                                                                                                                                                                                                                                                                                                                 | 17/77             | 2.29 (1.35-3.91) | 2.03 (1.18-3.50) | 1.72 (0.98-3.02) | 1.67 (0.95-2.93) |
| ASD-ID                                                                                                                                                                                                                                                                                                                                 | 16/115            | 1.36 (0.80-2.31) | 1.19 (0.70-2.04) | 1.01 (0.58-1.76) | 1.01 (0.58-1.76) |
| Model 1 adjusted for parental ages, income, education, occupation, migration status, parity<br>Model 2= model 1+ any other psychiatric condition (including psychosis, bipolar, neurodevelopmental, personality or drug and alcohol misuse disorders)<br>Model 3= model 2+ both parents depression, both parents other psych condition |                   |                  |                  |                  |                  |

| Table S7 Odds ratios depicting the relationship between parental depression before birth of child and offspring ASD, ASD with and without ID in at least 8 YEAR OLD children                                                                                                                                                                                                                                                                                                                                    |                                      |                  |                  |                  |                  |
|-----------------------------------------------------------------------------------------------------------------------------------------------------------------------------------------------------------------------------------------------------------------------------------------------------------------------------------------------------------------------------------------------------------------------------------------------------------------------------------------------------------------|--------------------------------------|------------------|------------------|------------------|------------------|
|                                                                                                                                                                                                                                                                                                                                                                                                                                                                                                                 | N<br>(exposed)<br>cases/<br>controls | Crude OR         | Model 1          | Model 2          | Model 3          |
| <b>Maternal depression</b>                                                                                                                                                                                                                                                                                                                                                                                                                                                                                      |                                      |                  |                  |                  |                  |
| ASD                                                                                                                                                                                                                                                                                                                                                                                                                                                                                                             | 30/151                               | 1.97 (1.32-2.94) | 1.77 (1.18-2.65) | 1.81 (1.21-2.71) | 1.75 (1.17-2.62) |
| ASD+ID                                                                                                                                                                                                                                                                                                                                                                                                                                                                                                          | 7/66                                 | 1.11 (0.50-2.44) | 1.05 (0.48-2.32) | 1.08 (0.49-2.40) | 1.04 (0.47-2.32) |
| ASD-ID                                                                                                                                                                                                                                                                                                                                                                                                                                                                                                          | 23/85                                | 2.59 (1.62-4.14) | 2.21 (1.37-3.56) | 2.24 (1.39-3.62) | 2.19 (1.35-3.54) |
| <b>Paternal depression</b>                                                                                                                                                                                                                                                                                                                                                                                                                                                                                      |                                      |                  |                  |                  |                  |
| ASD                                                                                                                                                                                                                                                                                                                                                                                                                                                                                                             | 11/99                                | 1.06 (0.56-1.98) | 0.99 (0.53-1.86) | 1.00 (0.53-1.88) | 1.01 (0.54-1.89) |
| ASD+ID                                                                                                                                                                                                                                                                                                                                                                                                                                                                                                          | 4/38                                 | 0.98 (0.35-2.76) | 0.93 (0.33-2.64) | 0.94 (0.33-2.68) | 0.93 (0.33-2.63) |
| ASD-ID                                                                                                                                                                                                                                                                                                                                                                                                                                                                                                          | 7/61                                 | 1.10 (0.50-2.43) | 1.00 (0.45-2.22) | 1.02 (0.46-2.26) | 1.03 (0.46-2.28) |
| <p>Numbers in study (maximum): ASD cases n=3877, controls n=37500;<br/> ASD+ID cases n=1612, controls n=15967;<br/> ASD-ID cases n=2265, controls n=21533</p> <p>Model 1 adjusted for parental ages, income, education, occupation, migration status, parity<br/> Model 2= model 1+ any other psychiatric condition (including psychosis, bipolar, neurodevelopmental, personality or drug and alcohol misuse disorders)<br/> Model 3= model 2+ both parents depression, both parents other psych condition</p> |                                      |                  |                  |                  |                  |

| Table S8 Parental History of Depression before birth of child and risk of offspring ASD- MODEL 4 for each analysis (includes mediators)                                         |                             |                             |                        |                            |                                    |                                 |
|---------------------------------------------------------------------------------------------------------------------------------------------------------------------------------|-----------------------------|-----------------------------|------------------------|----------------------------|------------------------------------|---------------------------------|
|                                                                                                                                                                                 | For main analysis (Table 2) | Born before 1990 (Table S3) | Primiparous (Table S4) | Swedish parents (Table S5) | Non hierarchical coding (Table S6) | At least 8 year olds (Table S7) |
| <b>Mothers</b>                                                                                                                                                                  |                             |                             |                        |                            |                                    |                                 |
| ASD                                                                                                                                                                             | 1.50 (1.06-2.13)            | 2.30 (1.11-4.76)            | 1.93 (1.09-3.42)       | 1.69 (1.14-2.50)           | 1.23 (0.90-1.70)                   | 1.71 (1.11-2.64)                |
| ASD+ID                                                                                                                                                                          | 1.17 (0.62-2.19)            | 2.03 (0.50-8.14)            | 1.91 (0.57-6.38)       | 1.78 (0.90-3.52)           | 0.89 (0.50-1.59)                   | 1.18 (0.52-2.67)                |
| ASD-ID                                                                                                                                                                          | 1.72 (1.13-2.64)            | 2.22 (0.93-5.31)            | 2.04 (1.04-3.97)       | 1.70 (1.05-2.75)           | 1.46 (0.98-2.17)                   | 2.09 (1.24-3.54)                |
| <b>Fathers</b>                                                                                                                                                                  |                             |                             |                        |                            |                                    |                                 |
| ASD                                                                                                                                                                             | 1.04 (0.61-1.77)            | 0.92 (0.21-4.04)            | 0.56 (0.19-1.63)       | 1.12 (0.58-2.17)           | 1.23 (0.80-1.90)                   | 0.83 (0.40-1.74)                |
| ASD+ID                                                                                                                                                                          | 1.28 (0.59-2.77)            | 3.19 (0.56-18.08)           | 0.79 (0.14-4.46)       | 1.90 (0.71-5.06)           | 1.58 (0.85-2.94)                   | 0.75 (0.22-2.50)                |
| ASD-ID                                                                                                                                                                          | 0.82 (0.39-1.74)            | -                           | 0.37 (0.08-1.64)       | 0.73 (0.28-1.87)           | 0.88 (0.47-1.64)                   | 0.81 (0.32-2.06)                |
| Model 4 = model 3 in tables 2, S3, S4, S5, S6 and S7 further adjusted for gestational age at birth, birth weight for gestational age, maternal smoking, diabetes, hypertension. |                             |                             |                        |                            |                                    |                                 |



| Table S9 Odds ratios depicting the relationship between parental depression before birth of child and offspring ASD, ASD with and without ID in children born between 1984-2003 with ALL AVAILABLE DATA                                                                                                                                                                                                                                                                                                                                                                                                                                                                                                                         |                                 |                  |                  |                  |                  |                  |
|---------------------------------------------------------------------------------------------------------------------------------------------------------------------------------------------------------------------------------------------------------------------------------------------------------------------------------------------------------------------------------------------------------------------------------------------------------------------------------------------------------------------------------------------------------------------------------------------------------------------------------------------------------------------------------------------------------------------------------|---------------------------------|------------------|------------------|------------------|------------------|------------------|
|                                                                                                                                                                                                                                                                                                                                                                                                                                                                                                                                                                                                                                                                                                                                 | N (max exposed) cases/ controls | Crude OR         | Model 1          | Model 2          | Model 3          | Model 4          |
| <b>Maternal depression</b>                                                                                                                                                                                                                                                                                                                                                                                                                                                                                                                                                                                                                                                                                                      |                                 |                  |                  |                  |                  |                  |
| ASD                                                                                                                                                                                                                                                                                                                                                                                                                                                                                                                                                                                                                                                                                                                             | 47/284                          | 1.67 (1.22-2.28) | 1.50 (1.08-2.08) | 1.54 (1.11-2.13) | 1.49 (1.08-2.08) | 1.50 (1.06-2.13) |
| ASD+ID                                                                                                                                                                                                                                                                                                                                                                                                                                                                                                                                                                                                                                                                                                                          | 13/124                          | 1.05 (0.59-1.86) | 0.96 (0.52-1.76) | 0.98 (0.53-1.80) | 0.96 (0.52-1.77) | 1.17 (0.62-2.19) |
| ASD-ID                                                                                                                                                                                                                                                                                                                                                                                                                                                                                                                                                                                                                                                                                                                          | 34/160                          | 2.15 (1.48-3.12) | 1.85 (1.24-2.74) | 1.90 (1.28-2.82) | 1.86 (1.25-2.77) | 1.72 (1.13-2.64) |
| <b>Paternal depression</b>                                                                                                                                                                                                                                                                                                                                                                                                                                                                                                                                                                                                                                                                                                      |                                 |                  |                  |                  |                  |                  |
| ASD                                                                                                                                                                                                                                                                                                                                                                                                                                                                                                                                                                                                                                                                                                                             | 19/159                          | 1.18 (0.73-1.90) | 1.11 (0.68-1.79) | 1.13 (0.70-1.83) | 1.12 (0.69-1.82) | 1.04 (0.61-1.77) |
| ASD+ID                                                                                                                                                                                                                                                                                                                                                                                                                                                                                                                                                                                                                                                                                                                          | 9/64                            | 1.38 (0.69-2.78) | 1.33 (0.65-2.72) | 1.36 (0.67-2.78) | 1.35 (0.66-2.77) | 1.28 (0.59-2.77) |
| ASD-ID                                                                                                                                                                                                                                                                                                                                                                                                                                                                                                                                                                                                                                                                                                                          | 10/95                           | 1.04 (0.54-2.00) | 0.96 (0.50-1.87) | 0.98 (0.51-1.91) | 0.97 (0.50-1.89) | 0.82 (0.39-1.73) |
| <p>Numbers in study (maximum): ASD cases n=4952, controls n=49520;<br/> ASD+ID cases n=2097, controls n=20970;<br/> ASD-ID cases n=2855, controls n=28550</p> <p>Model 1 adjusted for parental ages, income, education, occupation, migration status, parity<br/> Model 2= model 1+ any other psychiatric condition (including anxiety disorder, psychotic and bipolar disorders, neurodevelopmental, personality or drug and alcohol misuse disorders)<br/> Model 3= model 2+ both parents depression, both parents other psych condition<br/> Model 4= adjusted for maternal report of smoking, record of diabetes, hypertension, birth weight for gestational age, gestational age at birth and Apgar score at 5 minutes</p> |                                 |                  |                  |                  |                  |                  |

| Table S10 Odds ratios depicting the relationship between maternal depression before birth of child and offspring ASD adjusting for antidepressant use during pregnancy in children born 1995-2003 USING ALL AVAILABLE DATA                                                                                                                                                                              |                             |                  |                  |                  |                  |
|---------------------------------------------------------------------------------------------------------------------------------------------------------------------------------------------------------------------------------------------------------------------------------------------------------------------------------------------------------------------------------------------------------|-----------------------------|------------------|------------------|------------------|------------------|
|                                                                                                                                                                                                                                                                                                                                                                                                         | N (exposed) cases/ controls | Crude OR         | Model 1          | Model 2          | Model 3          |
| <b>Maternal depression</b>                                                                                                                                                                                                                                                                                                                                                                              |                             |                  |                  |                  |                  |
| ASD                                                                                                                                                                                                                                                                                                                                                                                                     | 25/181                      | 1.39 (0.91-2.12) | 1.25 (0.81-1.93) | 1.34 (0.87-2.08) | 1.19 (0.76-1.87) |
| ASD+ID                                                                                                                                                                                                                                                                                                                                                                                                  | 9/87                        | 1.04 (0.52-2.07) | 1.03 (0.51-2.09) | 1.06 (0.52-2.16) | 1.04 (0.50-2.13) |
| ASD-ID                                                                                                                                                                                                                                                                                                                                                                                                  | 16/94                       | 1.72 (1.01-2.94) | 1.43 (0.82-2.51) | 1.58 (0.90-2.79) | 1.30 (0.72-2.34) |
| <p>Numbers in study (maximum): ASD cases n=1918, controls n=19180;<br/> ASD+ID cases n=743, controls n=7584;<br/> ASD-ID cases n=936, controls n=9261</p> <p>Model 1 adjusted for antidepressant use during pregnancy only<br/> Model 2= adjusted for parental ages, income, education, occupation, migration status, parity<br/> Model 3= model 2 adjusted for antidepressant use during pregnancy</p> |                             |                  |                  |                  |                  |

Table S11 Odds ratios depicting the relationship between maternal depression, antidepressant use during pregnancy, and offspring ASD (with and without ID) in children born between 1995-2003 USING ALL AVAILABLE DATA

|                                      | ASD            |                  |                  | ASD + ID       |                  |                  | ASD-ID         |                   |                   |
|--------------------------------------|----------------|------------------|------------------|----------------|------------------|------------------|----------------|-------------------|-------------------|
|                                      | N case/control | Crude OR         | Adjusted OR      | N case/control | Crude OR         | Adjusted OR      | N case/control | Crude OR          | Adjusted OR       |
| No depression, no antidepressant use | 1872/18877     | 1.00 (Ref)       | 1.00 (Ref)       | 849/8508       | 1.00 (Ref)       | 1.00 (Ref)       | 1023/10369     | 1.00 (Ref)        | 1.00 (Ref)        |
| Depression but no antidepressant use | 25/198         | 1.28 (0.84-1.95) | 1.06 (0.68-1.66) | 11/93          | 1.19 (0.63-2.23) | 1.06 (0.54-2.07) | 14/105         | 1.36 (0.77-2.38)  | 1.04 (0.57-1.92)  |
| Depression with antidepressant use   | 9/28           | 3.31 (1.54-7.08) | 3.34 (1.50-7.47) | 2/13           | 1.54 (0.35-6.84) | 1.81 (0.39-8.56) | 7/15           | 4.99 (1.98-12.61) | 4.94 (1.85-13.23) |
| Antidepressant use but no depression | 12/77          | 1.58 (0.86-2.91) | 1.61 (0.85-3.06) | 3/36           | 0.84 (0.26-2.73) | 0.93 (0.27-3.21) | 9/41           | 2.24 (1.08-4.63)  | 2.10 (0.97-4.57)  |

Max n ASD=1918, controls=19180, ASD+ID=865, controls 8650; ASD-ID=1053 controls=10530

Note: Depression refers to any outpatient (secondary care) or inpatient record of depression before the birth of the child. Antidepressant use refers to any antidepressant use recorded at the first antenatal interview.

Adjusted OR= adjusted for history of psychiatric disorders other than depression, parental ages, income, education, occupation, migration status, parity

Table S12 Odds ratios depicting the relationship between antidepressant use during pregnancy and offspring ASD, and ASD with and without ID in children born 1995-2003 USING ALL AVAILABLE DATA

|                    | ASD            |                  |                  | ASD + ID       |                  |                   | ASD-ID         |                  |                  |
|--------------------|----------------|------------------|------------------|----------------|------------------|-------------------|----------------|------------------|------------------|
|                    | N case/control | Crude OR         | Adjusted OR      | N case/control | Crude OR         | Adjusted OR       | N case/control | Crude OR         | Adjusted OR      |
| Any antidepressant | 21/105         | 2.02 (1.26-3.25) | 1.90 (1.15-3.14) | 5/49           | 1.02 (0.40-2.57) | 1.09 (0.41-2.88)  | 16/56          | 2.92 (1.66-5.14) | 2.54 (1.37-4.68) |
| SSRI               | 14/75          | 1.88 (1.06-3.35) | 1.65 (0.90-3.03) | 4/39           | 1.03 (0.37-2.88) | 1.01 (0.34-2.98)  | 10/36          | 2.86 (1.40-5.84) | 2.34 (1.09-5.06) |
| Non-selective MRI  | 6/22           | 2.73 (1.11-6.73) | 2.69 (1.04-6.96) | 1/8            | 1.25 (0.16-9.99) | 1.72 (0.20-15.03) | 5/14           | 3.57 (1.29-9.92) | 2.93 (0.98-8.82) |

Max n= ASD 1918, control 19180

SSRI=selective serotonin reuptake inhibitors; Non-selective MRI=non selective monoamine reuptake inhibitors

Adjusted OR=adjusted for any maternal psychiatric disorder, maternal age, paternal age, parental income, education and occupation, and maternal country of birth and birth parity.
